# Supplementary material for: TYK2 Variants in B-Acute Lymphoblastic Leukaemia
Source: PubMed Central journal article supplement (PMC7761059; doi:10.3390/genes11121434), 2020-11-28
Supplement: genes-11-01434-s001.pdf [file genes-11-01434-s001.pdf]

**Table S1.** Sequences of primers used to amplify *TYK2* in the NGS study

| <b>Amplicon ID</b> | <b>Ion AmpliSeq Forward Primer</b>                   | <b>Ion AmpliSeq Reverse Primer</b> | <b>Amplicon Start<sup>a</sup></b> | <b>Amplicon Stop</b> |
|--------------------|------------------------------------------------------|------------------------------------|-----------------------------------|----------------------|
| 7153692681         | CCTCAAGATCATGGTTAGGC<br>TCA                          | CCTCATACCCATTCTGAAGACAGTC          | 10461312                          | 10461582             |
| 7153692680         | GGAGACCAGACTCCCAGCTAA                                | CACCTCTGTGAACCTATTTTTCTTTC<br>TTGG | 10461145                          | 10461368             |
| 7153692679         | GTGCTCCCATCCAAGTGCA                                  | AATGGGCGTGTGCGTTTC                 | 10491084                          | 10491302             |
| 7153692678         | CAGGGTCGGAGTGAAGTTTG                                 | CGGAGGTCCTCAGGAAGAAG               | 10490948                          | 10491151             |
| 7153692676         | GGTTGTAATGTTCAATATAG<br>TTCCGCAT                     | AGGAGAATTGTGGCCTGAAAGAG            | 10490405                          | 10490560             |
| 7153692675         | GTA AAAATAAAAATCTGCTCT<br>TAACACACCTCC               | CAGGGTCTGTGCTGAATGTGTAAT           | 10490221                          | 10490458             |
| 7153692672         | CCCAGACTCACCAACTTTATG<br>TG                          | GGTCTCTGGGCTGAGACTTG               | 10488878                          | 10489149             |
| 7153193306         | GCTCGAGTGTGGCTAGGTA                                  | GTTAAGCCACTTGCCCTGTG               | 10476410                          | 10476654             |
| 7153193297         | CTCCTTGTTACCTCCTCCTCTA                               | CCAGCAGATGGTCATGGTCAA              | 10476195                          | 10476451             |
| 7153193290         | CCTCAGAGGCTAGGGTCAAG                                 | AGACCCTGGCCCTGAGTCTG               | 10476107                          | 10476301             |
| 7153193266         | GGGCGATGTCATGGTGACTAG<br>AGAGTCTCTAATTGGCTAGGC<br>CA | AGATCAGCTGCTAACTTTCACCATG          | 10472447                          | 10472685             |
| 7153193238         | CAAAAGTCTCCACCCACCTTA                                | GCTCTACCACGAGCACATCATC             | 10464614                          | 10464767             |
| 7153193175         | GCTCTCATTCTTAAAGTGGTG<br>GATCT                       | ACGGTAGCAAATGACGTGACT              | 10478953                          | 10479142             |
| 7153193142         | AAAAAGTAGAGGCACGGCAAT<br>ATG                         | GATACCTCTGGGCTAGAGAGGAA            | 10477172                          | 10477322             |
| 7153193133         | CGTCAAAGCAGATCTCCAGG<br>AG                           | GTTTGTGAATGACGTGGCATCA             | 10476991                          | 10477245             |
| 7153193109         | TGGTAGCCCAGAGAGACTTG<br>AA                           | TCTCCAGGGAGGGTGAGTAC               | 10468474                          | 10468690             |
| 7153193103         | CATGATGATGAGATTGGAGGT<br>TTCTG                       | CTAAGCACCGCCATGGACAAGT             | 10468313                          | 10468535             |
| 7153193037         | ACAGAATACCGCCATGGTG<br>AA                            | CCAGCGTTCGGGAACTTG                 | 10472834                          | 10473038             |
| 7153193033         | CCTGCTCATACCTGTCTAAA<br>GA                           | CCCTCCATGACTTGATGCCT               | 10472648                          | 10472885             |
| 7153193012         | AGACCTGGCTCATGAGGCT                                  | GCTGGTCTGACTCTGTGCTAAG             | 10478719                          | 10478927             |
| 7153104521         | GGTCTAGGTTGAAGTCAAGGT                                | CCTAGTCACCATGACATCGC               | 10472237                          | 10472470             |
| 7153104502         | CCACACACCAGGTAGCTGAG                                 | CACAGGCCTTCTACGAGACA               | 10472020                          | 10472279             |
| 7153104476         | AGGGCGAAACTCCACCTAAAAC                               | AAGTCCCTCCCTGGCGTCT                | 10469842                          | 10470065             |
| 7153104453         | CATGCTTATGAATGCCACTGCAA                              | CCCATGGCTTGGAAAGATGGT              | 10469720                          | 10469907             |
| 7153104383         | CTACTCCACCCTGCCTGTTT                                 | CAGTGTCTGACCTATGAGCCAA             | 10467103                          | 10467322             |
| 7153104356         | GGCCACACACATTACCATGAAC                               | CCCACTGAAACTCACGAGC                | 10463537                          | 10463809             |
| 7153104324         | CAGAGGTCACCAAGGGTGAAAG                               | CCAGTGATAGTCACAGTTGTCCTT<br>TTC    | 10468777                          | 10468928             |
| 7153104297         | GTGCTCCAGTGAATGAGGTACAG                              | CACCTCAGGAGAACAAGAACCTG            | 10468609                          | 10468822             |
| 7153104240         | CGTCTGCTGCTCAATGGG                                   | CCTCTAAGTAGGTAATGAGTGTC<br>ATTGTT  | 10473270                          | 10473423             |
| 7153104219         | CGCCAGATCTCGGATCTTTTT                                | ATTTGTGCAGGCCAAGCTG                | 10473074                          | 10473327             |
| 7153104090         | CCAGGCAGATCCTTTCCGAATA                               | AGTTTTCTTACCTCTAGAATCGGAT<br>CCT   | 10465189                          | 10465404             |
| 7153104057         | CCTGGCCTTGGTACTTCTCATG                               | CGGTTTTCCACAAGCGCTATTTG            | 10464992                          | 10465234             |
| 7153103962         |                                                      | GAGACTTCCTTGTCTTCCCTGA             | 10461535                          | 10461725             |

| <b>Amplicon ID</b> | <b>Ion AmpliSeq Forward Primer</b> | <b>Ion AmpliSeq Reverse Primer</b> | <b>Amplicon Start<sup>a</sup></b> | <b>Amplicon Stop</b> |
|--------------------|------------------------------------|------------------------------------|-----------------------------------|----------------------|
| 7153103724         | GTTGGTCGGATCGTAGCAGTAC             | CCAAGGAGTCTTAATAGAGCGGAGTA         | 10464865                          | 10465054             |
| 7153103694         | CGCAGCAGCCCTTGACTT                 | ACTTCGGCAAGGTCAGCTT                | 10464726                          | 10464906             |
| 7153103626         | CCCAGCCTATGCCTTTCTAATTG            | GGGTCCTCAGTCTCAGGTGA               | 10463045                          | 10463320             |
| 7153103564         | CCATCCCGGATGCTCATCAC               | TGAAAGAGCACTGTGTCAGCAT             | 10475307                          | 10475573             |
| 7153103445         | GGCCGTCAGGCGGAAATA                 | CTGTGACTTCCGGGACATCA               | 10475372                          | 10475605             |
| 7153103408         | GTCTCCCAGCAGTTCTTCATGA             | CCTGCCTTTCATTGCCTCTTGA             | 10461612                          | 10461887             |
| 7153103317         | CGACCAACCTCGCAGATCT                | ACCTGAGAACTGGGTCTAGTGT             | 10464195                          | 10464458             |
| 7153103290         | GTGTGGCCAAGCAAGCCAAAC              | CAGCTGGTCATGGAGTACGT               | 10464038                          | 10464308             |
| 7153094479         | GCTGCCTCTGGTAGAAATGCTC             | CCTCATCTGTATAATGGAAGT<br>GATAAGAGC | 10467369                          | 10467525             |
| 7153094476         | CGCAGGATGGTGCAGGAAT                | TGGGTCCCTTTCCCAACAGA               | 10467269                          | 10467413             |
| 7153094389         | CCCTAGGGCTCACAGTCTAGTT             | CGACTCCAGCCACTACCTGT               | 10475222                          | 10475373             |
| 7153094366         | CCCAGATAGCATGAGTTGAAACCT           | GACCCAGCCTCATTGAGTACC              | 10478613                          | 10478763             |

<sup>a</sup>Human Feb. 2009 (GRCh37/hg19) Genome Assembly. Human *TYK2* is located in chromosome 19. The following sequences are not covered by these amplicons: in exon 11 from G530 to P506; in exon 8 from T384 to G338; in exon 3 from V64 to A61.

**Table S2.** Clinical data of patients with *TYK2* non-synonymous variants

| Patient ID | Age years/Sex | Risk Group | Frontline therapy     | EGIL      | Cytogenetic subgroup     | Bone marrow blasts % | TYK2 variant    | VAF %    | Clinical status      |
|------------|---------------|------------|-----------------------|-----------|--------------------------|----------------------|-----------------|----------|----------------------|
| 1          | 3/F           | UNK        | SHOP-2005             | ALL-B II  | TCF3(E2A)-PBX1           | 90                   | R425H           | 48       | CCR-A                |
| 2          | 46/F          | HR         | Idarrubicine-(Ara-C)  | MPAL      | Hyper (47-50)            | 50                   | S431G           | 36       | Rel-D                |
| 3          | 14/F          | HR         | SHOP-2005             | ALL-B II  | Normal                   | 97                   | I684S<br>P1104A | 47<br>32 | CCR-A                |
| 4          | 7/F           | UNK        | SHOP-2005             | ALL-B     | TEL-AML1                 | UNK                  | I684S           | 49       | CCR-A                |
| 5          | 9/F           | HR         | LAL-SHOP-2005 HR      | ALL-B III | Low hyperdiploid (47-50) | UNK                  | I684S           | 49       | CCR-A                |
| 6          | 8/F           | IR         | PETHEMA LAL-RI/96     | ALL-B III | Others                   | 90                   | I684S           | 51       | CCR-A                |
| 7          | 13/M          | HR         | SHOP-2005             | ALL-B II  | Low hyperdiploid (47-50) | 92                   | I684S           | 49       | CCR-A                |
| 8          | 68/F          | HR         | PETHEMA OLD-07 HR PH+ | ALL-B     | <i>BCR-ABL1</i>          | 92                   | I684S           | 46       | Maintenance Imatinib |
| 9          | 5/F           | LR         | PETHEMA LAL-BR 2001   | ALL-B II  | High hyperdiploid (>50)  | 52                   | I684S           | 50       | CCR-A                |
| 10         | 93/F          | HR         | UNK                   | ALL-B III | <i>BCR-ABL1</i>          | UNK                  | I684S<br>P1104A | 49<br>51 | Rel-D                |
| 11         | 11/M          | HR         | SHOP-2005             | ALL-B II  | High hypodiploid (44-45) | 95                   | I684S           | 54       | CCR-A                |
| 12         | 2/M           | UNK        | SHOP-2005             | ALL-B III | Not evaluable            | 99                   | I684S           | 54       | UNK                  |
| 13         | 52/M          | HR         | UNK                   | ALL-B III | High hyperdiploid (>50)  | UNK                  | I684S           | 48       | Rel-D                |
| 14         | 6/F           | UNK        | SHOP-99               | ALL-B III | Normal cytogenetics      | 95                   | R730W           | 49       | CCR-A                |
| 15         | 4/F           | UNK        | SHOP-2005             | ALL-B II  | Not evaluable            | 90                   | R832W           | 30       | CCR-A                |
| 16         | 10/F          | HR         | SHOP-2005             | ALL-B II  | TCF3(E2A)-PBX1           | 100                  | E1163G          | 47       | Rel-D                |

VAF: Variant allele frequency; M, male; F, female, LR, low risk; IR, intermediate risk; HR, high risk; UNK, unknown; N, no; CCR, continuous complete remission; R, Relapse; D, dead; A, alive. EGIL, European Group for the Immunological Classification of Leukaemias. Patients were treated according to PETHEMA (Spanish Programme for Haematology Treatments) and SEHOP (Spanish Society of Haematology and Paediatric Oncology) risk-adapted protocols. Risk-group stratification was established according to PETHEMA protocols based on age, white blood cell count and cytogenetic subgroup.

**Table S3.** Calculation of the theoretical energy components from the trajectories of molecular dynamics.

| <b>TYK2</b> | $\Delta E_{\text{vdw}}$ | $\Delta E_{\text{ele}}$ | $\Delta G_{\text{GB}}$ | $\Delta G_{\text{solv}}$ | $\Delta G_{\text{bind}}$ |
|-------------|-------------------------|-------------------------|------------------------|--------------------------|--------------------------|
| WT          | $-156.13 \pm 12.0$      | $-557.30 \pm 78.6$      | $617.64 \pm 68.3$      | $-22.05 \pm 1.7$         | $-117.85 \pm 12.4$       |
| R425H       | $-156.87 \pm 12.0$      | $-612.72 \pm 78.6$      | $669.18 \pm 69.9$      | $-22.39 \pm 1.3$         | $-122.81 \pm 10.0$       |
| S431G       | $-152.42 \pm 9.4$       | $-666.01 \pm 65.9$      | $713.94 \pm 62.7$      | $-21.99 \pm 1.0$         | $-126.49 \pm 12.6$       |

$\Delta E_{\text{vdw}}$ , contributions of van der Waals interactions;  $\Delta E_{\text{ele}}$ , electrostatic energy;  $\Delta G_{\text{GB}}$ , polar solvation energy;  $\Delta G_{\text{solv}}$ , desolvation free energy ( $\Delta G_{\text{solv}} = \Delta G_{\text{GB}} + \Delta G_{\text{nonpol}}$ );  $\Delta G_{\text{bind}}$ , binding affinity.

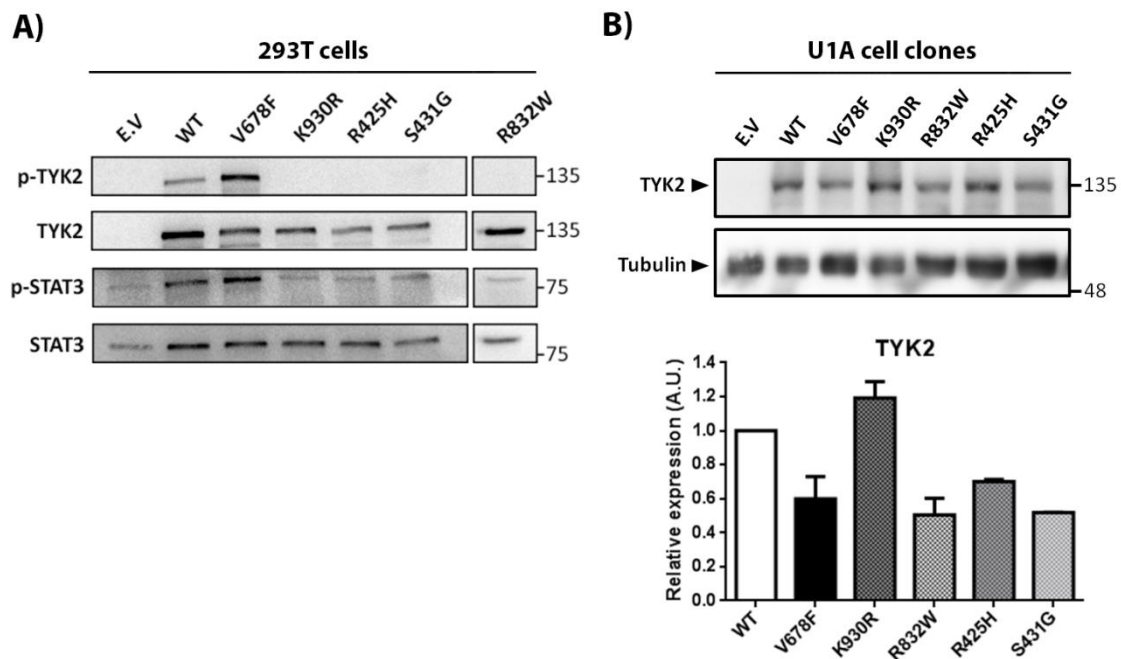

**Figure S1.** Auto-phosphorylation activity of TYK2 variants and comparison of TYK2 expression in selected cell clones. A) Basal auto-phosphorylation state. 293T cells were transiently transfected with empty vector (EV) or TYK2 variants. Cell lysates were analysed by Western blot with anti pTYK2 Ab specific to phospho-Tyr1054/Tyr1055 in the activation loop, anti pSTAT3 (Y705), anti TYK2 and STAT3 mAb. B) TYK2 expression in selected stably transfected TYK2-deficient UA1 cell clones (upper panel) and relative quantification (lower panel).

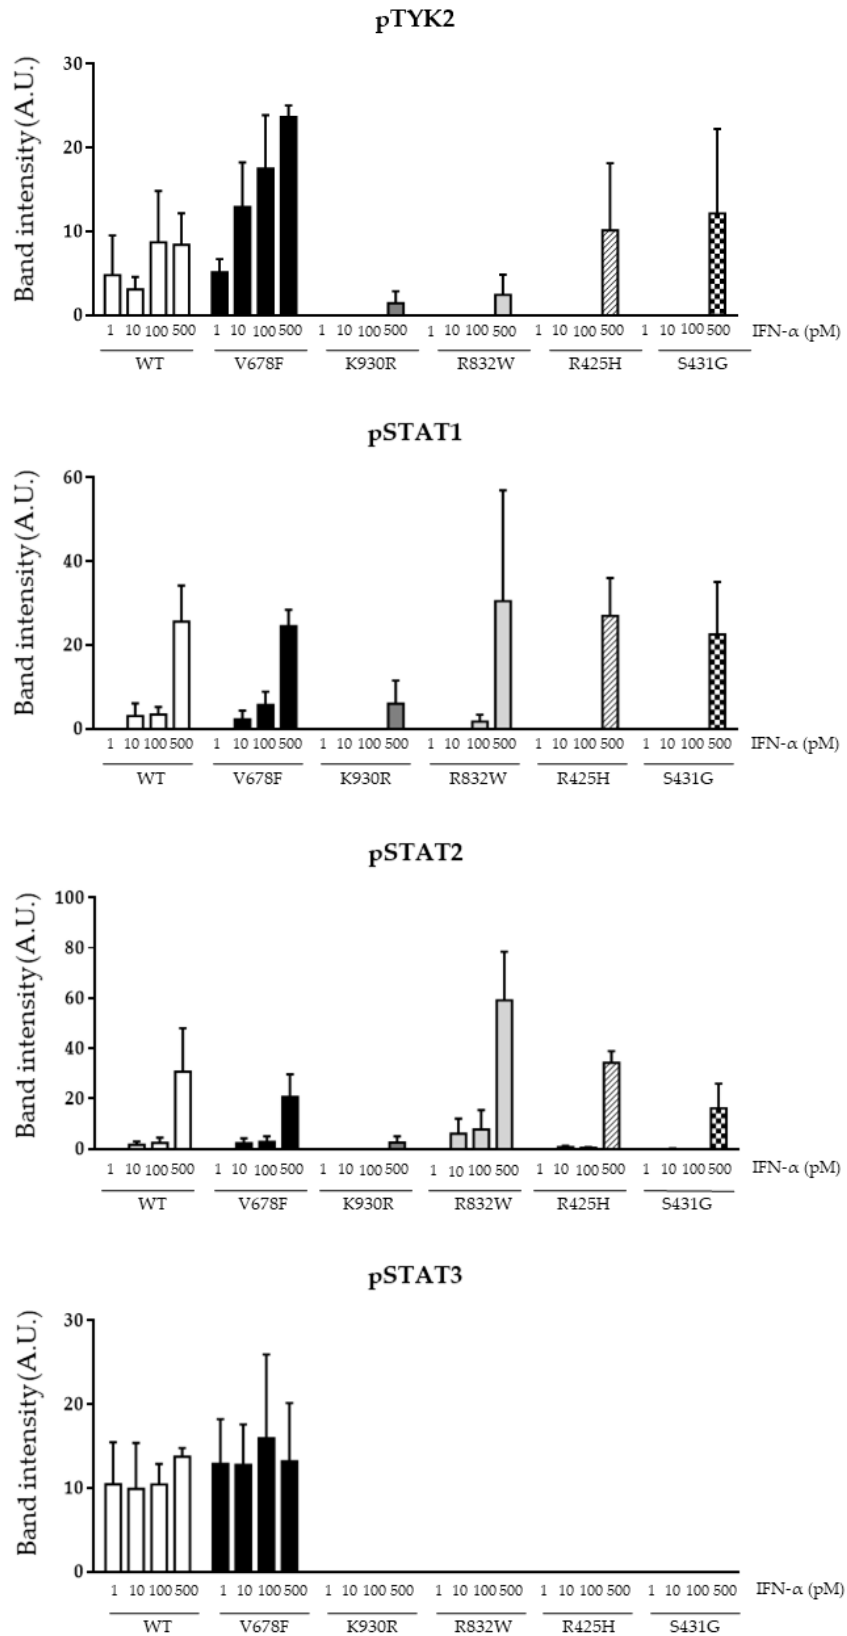

**Figure S2.** Quantification of pTyk2 and pStat1-3 from western blot analysis of TYK2 variants in response to IFN- $\alpha$ . The level of phosphorylated proteins was normalized to TYK2 total protein and then to tubulin. Mean  $\pm$  SEM (n=3) is shown in arbitrary units (A.U.).

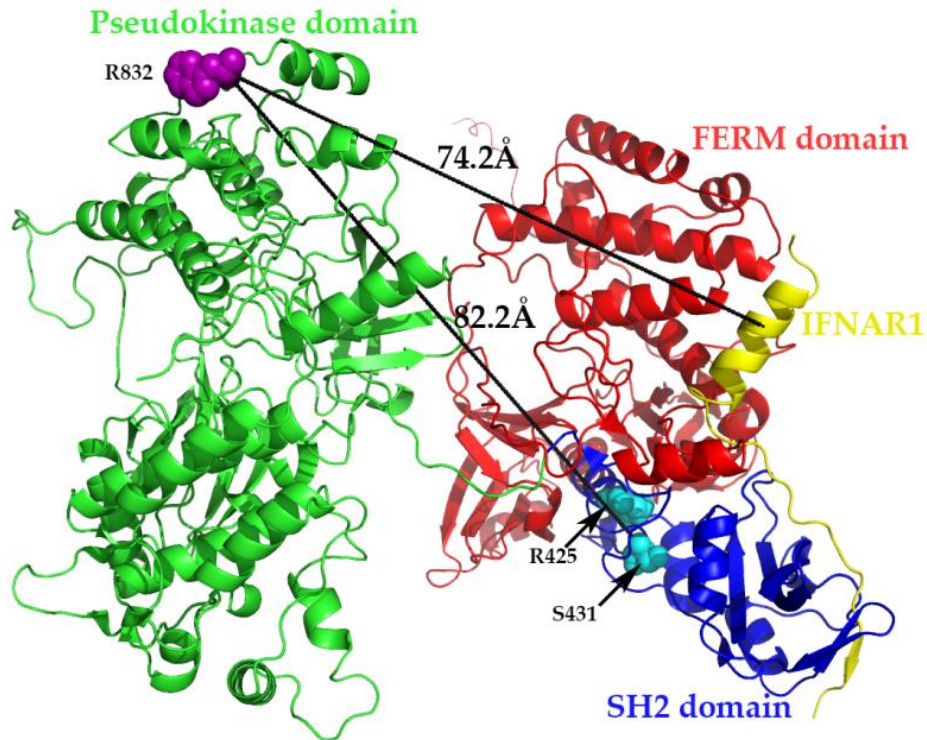

**Figure S3.** Molecular modelling of the superposition of FERM, SH2 and pseudokinase domains on TYK2 protein. The molecular modelling of TYK2 protein was obtained from Phyre2 ([www.sbg.bio.ic.ac.uk](http://www.sbg.bio.ic.ac.uk))\* and TYK2 FERM and SH2 domains with IFNAR1 from the Protein Data Bank (ID PDB: 4PO6). The FERM domain is represented in red, SH2 domain in blue, and IFNAR1 in yellow. Pseudokinase domain (ID PDB: 3ZON) represented in green; the sites of TYK2 R425, S431, and R832 are represented with spheres.

\* Kelley LA et al. The Phyre2 web portal for protein modelling, prediction and analysis. Nature Protocols 10, 845-858 (2015)

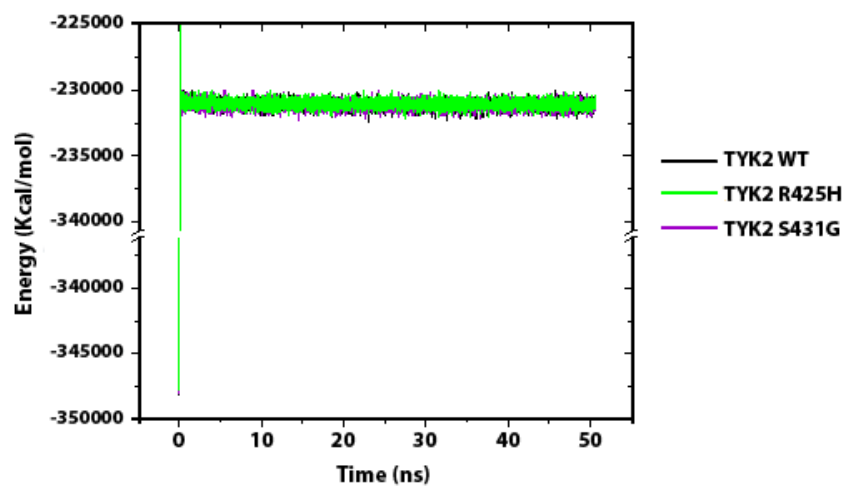

**Figure S4.** Total energy time course of TYK2 WT-IFNAR1, TYK2 R425H-IFNAR and TYK2 S431G-IFNAR1 complexes. Total energy was monitored as a function of time during the molecular dynamics trajectory, showing that from 10ns it remains stable.



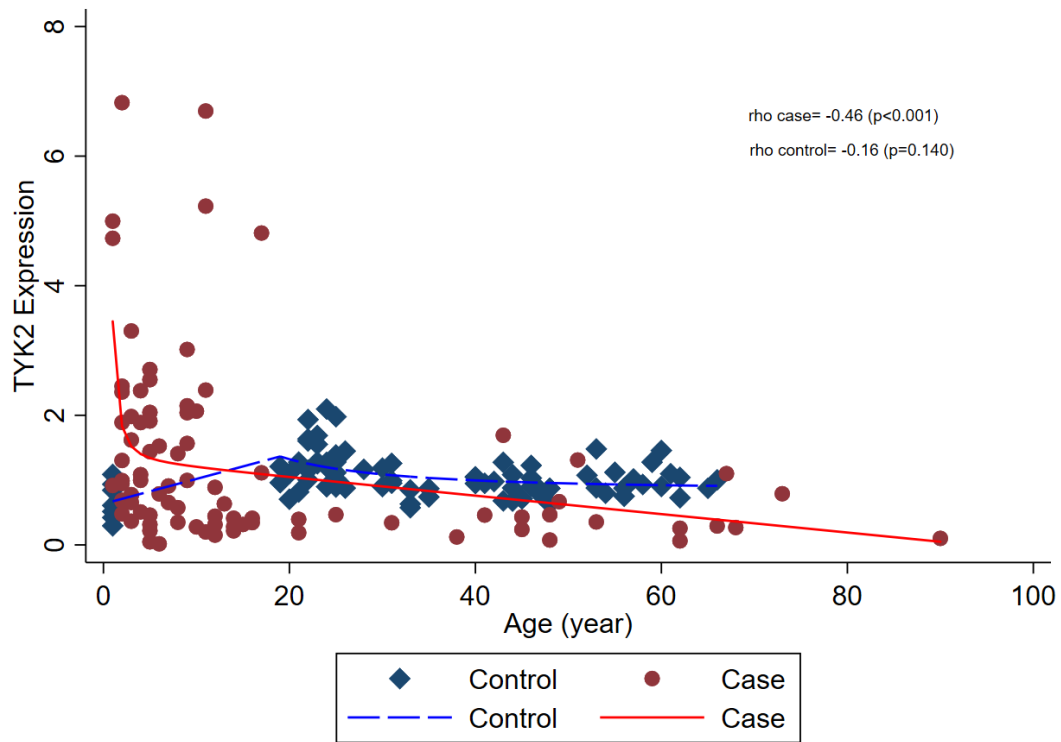

**Figure S5.** Association between *TYK2* expression and age. Scatter plot represents *TYK2* expression and age of patients (Fit curve in red) and healthy controls (blue). Association was estimated using Spearman correlation. Correlation coefficient ( $\rho$ ) is show inside the graph.

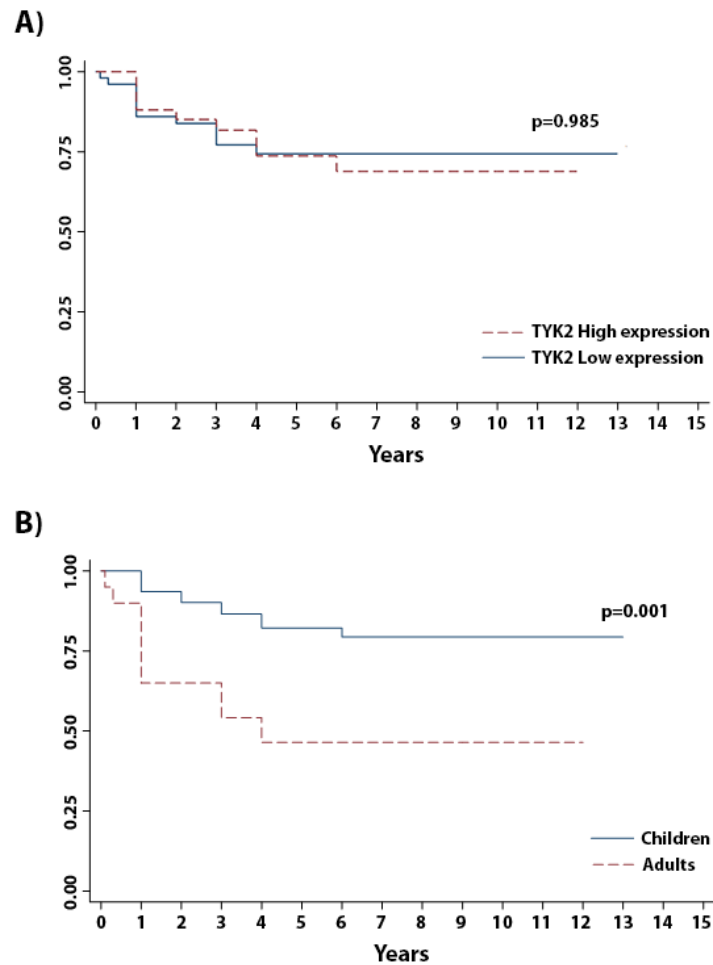

**Figure S6.** Overall survival of 88 B-ALL patients. A) Overall survival by TYK2 expression. No significant differences were found between the survival time of patients with low ( $< 1.009$ ) and high TYK2 expression ( $> 1.009$ ). This cut-off value is the median obtained in control samples. B) Overall survival by age. Adults presented worse outcome ( $p \leq 0.001$ ). Overall survival was represented by Kaplan-Meier curves. Curves were compared by log-rank tests. P values  $< 0.05$  were considered statistically significant.
